# Supplementary material for: Spinal cord stimulation alleviates cognitive deficits in chronic pain by targeting the microglial lnc-PCM1/PKC/IFN-γ axis to resolve neuroinflammation
Source: Research Square preprint supplement (doi:10.21203/rs.3.rs-8212646/v1), 2026-01-09
Supplement: Supplementary file 1 [file 4eb2e1aa9a3e2f4428491f8c.docx]

*Supplementary Table 1*. qRT-PCR primer design.

| **Primers name** | **Sequence (5'–3')** |
| --- | --- |
| MSTRG.15754.3-F | GTGTACCCCCATCCCCTTTG |
| MSTRG.15754.3-R | CTGTCAGTTCCACCAGGACC |
| NONRATT008064.2-F | AAGCTTCTCCAAGACCCTGC |
| NONRATT008064.2-R | CCACAAGTCCATTCCAGCCT |
| MSTRG.45600.2-F | GCAACATGCTGCTGCTACTC |
| MSTRG.45600.2-R | CTGTCTGTGCACTGAGTCGT |
| MSTRG.2883.14-F | ATTGCAGCCCTGTCCTCTTC |
| MSTRG.2883.14-R | CCCTCCCCTACATGAGAGCT |
| NONRATT007560.2-F | CGAGCCCGCAATGAAATCAG |
| NONRATT007560.2-R | GGAAACCACTTGCTGTGCTG |
| NONRATT002457.2-F | GTCTAACGTGCAGTTTGGGTC |
| NONRATT002457.2-R | CCCTGATCCTTGAGACTGGC |
| MSTRG.10933.12-F | AGGAAAAGCCGGTGCACATA |
| MSTRG.10933.12-R | TGGAACTGTAATGCAGGGTAGT |
| NONRATT028621.2-F | ACCTCTACCCTCATCCCCAC |
| NONRATT028621.2-R | TAGGGATTGGGGCTCGGTAA |
| NONRATT030737.2-F | CAGTCGTACTCTGCCATGTGT |
| NONRATT030737.2-R | AACTTGGGGACTGCTCACAA |
| MSTRG.3859.35-F | CCAATGGGCCGCAGTAGT |
| MSTRG.3859.35-R | TGTGGCCTACTGGGAACT |
| MSTRG.38008.3-F | ACTTTGCCAGTGCCTGCTAT |
| MSTRG.38008.3-R | TCACGGCTGTACCATAGGGG |
| MSTRG.10933.16-F | AGAAACGACCGTGTTGAGGA |
| MSTRG.10933.16-R | GCCTGAGAGGCAACCAAGAA |
| NONRATT008354.2-F | TCCTGCACCCTATAGCAGGT |
| NONRATT008354.2-R | GTCCCCAGATGCCATAGACG |
| MSTRG.45582.4-F | CTGCTCCTCTCACTATGCGG |
| MSTRG.45582.4-R | CCAGGAAGATGCCAAGCTGA |
| NONRATT003829.2-F | CTATGTTCGGCCAGCCTTCC |
| NONRATT003829.2-R | CCATCATCTGGGTACGGCTC |
| MSTRG.15754.3-F | GTGTACCCCCATCCCCTTTG |
| MSTRG.15754.3-R | CTGTCAGTTCCACCAGGACC |
| NONRATT002035.2-F | CTCATGTCCAACATGCAGCG |
| NONRATT002035.2-R | TTGGGTAGAAGGAGCGGGTA |
| MSTRG.6405.3-F-R | GGCACTTGTAGTGGCTCAGT |
| MSTRG.6405.3-R | GGCACTCCCTCCCTAAACAC |
| NONRATT016788.2-F | TGGGGTGGTGGGTAGTTTTG |
| NONRATT016788.2-R | GATCAAGGTGTAGGCGAGGG |
| NONRATT003469.2-F | GGTAACATCCCGTGAGGTCG |
| NONRATT003469.2-R | GCAAGAGGACACAACCCTGA |
| NONRATT012007.2-F | ACCAGCTGAACCAGTGCTAC |
| NONRATT012007.2-R | GCTAATGGCTGCTGCTGTTC |
| PCM1-F | GAGGTCCTAAGATGGCGGTG |
| PCM1-R | TTTGTTGTTAGCCGCCGTTG |
| IFN-γ-F | GGGTGGGGAAGAGATTGTCC |
| IFN-γ-R | TACAACCCCGCAATCACAGT |
| U6-F | CTCGCTTCGGCAGCACA |
| U6-R | AACGCTTCACGAATTTGCGT |
| GAPDH-F | CAAGGCTGAGAACGGGAAG |
| GAPDH-R | TGAAGACGCCAGTGGACTC |
| 18S-F | CATTCGAACGTCTGCCCTATC |
| 18S-R | CCTGCTGCCTTCCTTGGA |

The gene sequence was provided in the FASTA format using the National Center for Biotechnology Information (NCBI) gene database. Primer Premier software is used to design primers based on the base sequence. The selected primers were subjected to a specific BLAST search in NCBI and then synthesized and validated by China Weizhen Biotechnology Co., Ltd.

*Supplementary Table 2*. Primary antibodies.

| **Primary antibodies** | **Manufacturer** | **Dilution ratio** |
| --- | --- | --- |
| PCM1 | Abcam, UK | 1:1000 |
| PKC | Abcam, UK | 1:2000 |
| p-PKC | Abcam, UK | 1:2000 |
| IFN-γ | Abcam, UK | 1:2000 |
| c-fos | Abcam, UK | 1:200 |
| GFAP | Abcam, UK | 1:500 |
| NeuN | Abcam, UK | 1:200 |
| Iba1 | Abcam, UK | 1:100 |
| IFN-γR1 | Abcam, UK | 1:1000 |
| IFN-γR2 | Abcam, UK | 1:500 |
| GAPDH | Abcam, UK | 1:20000 |
| Bax | Abcam, UK | 1:20000 |
| Bcl2 | Abcam, UK | 1:5000 |
| Pro-Caspase3 | Abcam, UK | 1:2000 |
| Cleaved-Caspase3 | Abcam, UK | 1:2000 |
| Nrf2 | Abcam, UK | 1:1000 |
| SYN | Abcam, UK | 1:1000 |
| PSD95 | Abcam, UK | 1:1000 |
| Keap1 | Abcam, UK | 1:1000 |
