# Supplementary material for: Spinal cord stimulation alleviates cognitive deficits in chronic pain by targeting the microglial lnc-PCM1/PKC/IFN-γ axis to resolve neuroinflammation
Source: Research Square preprint supplement (doi:10.21203/rs.3.rs-8212646/v1), 2026-01-09
Supplement: Supplementary file 2 [file 6446e51a60f5cb6e4132d7bf.docx]

**Supplementary Methods 1: Surgical Procedure for the Spared Nerve Injury (SNI) Model in Rats**

**1. Animal Preparation and Anesthesia**

Rats were fasted for 12 hours with free access to water prior to surgery. The experimental rats were numbered, weighed, and marked according to the grouping list. All surgical instruments were sterilized by autoclaving for 2 hours and exposed to ultraviolet light for 15 minutes before the experiment. Immediately before surgery, instruments were disinfected with 75% ethanol, and a disposable surgical drape was placed.

Rats were deeply anesthetized with sodium pentobarbital (0.3% concentration) administered intraperitoneally at a dose of 1 ml/100 g body weight. Surgical procedures commenced after the loss of corneal reflexes. The surgical area was disinfected and covered with a sterile drape.

**2. Exposure of the Sciatic Nerve**

The anesthetized rat was placed in a prone position on the operating table with the right hind limb fixed upwards. The fur over the lateral thigh was shaved, the skin was disinfected with iodophor. A skin incision approximately 1 cm in length was made along the projected path of the sciatic nerve on the right *posterior* thigh. The subcutaneous tissue, fascia, and biceps femoris muscle were bluntly dissected to expose the main trunk of the sciatic nerve and its three terminal branches: the common peroneal nerve, the tibial nerve, and the sural nerve.

**3. Nerve Transection (SNI Model)**

According to the standard SNI procedure, the common peroneal and tibial nerves were carefully isolated. These two nerves were transected without ligation. A 1 mm segment of the distal nerve stump was resected approximately 2 mm from the planned transection point to prevent regeneration. Extreme care was taken to avoid any contact with or stretching of the intact sural nerve. All manipulations were performed under microscopic visualization to ensure accuracy and minimize unintended damage.

**4. Wound Closure and Postoperative Care**

The surgical area was irrigated with a diluted gentamicin sulfate solution to cleanse tissue debris. The muscle, fascia, and skin were sutured in layers using sterile 8-0 surgical sutures.

After surgery, rats were immediately transferred to a heating pad for recovery. Successful modeling was indicated by observable behavioral changes such as difficulty walking, dragging, limping, and eversion of the ipsilateral hind paw.

**5. Control Groups**

CON group (Naïve Control): Rats underwent no surgical procedure and were housed normally.Sham group: Rats underwent the same surgical procedure for exposure of the sciatic nerve and its three branches, but no nerve was transected or manipulated beyond exposure.Pain group (SNI model): Rats received the full SNI surgery as described above. Postoperatively, they were fasted with no water for 12 hours. To prevent infection, rats received an intramuscular injection of penicillin solution (80,000 units/rat, 0.1 ml) into the right thigh twice daily for 3 consecutive days.

**Supplementary Methods 2:Electrode Design and Verification of Electrode Positioning**

**1.Electrode Design**

The spinal cord stimulation (SCS) electrodes employed in this study were custom-fabricated based on a previously established and validated design. Each electrode was constructed on a flexible polyimide substrate to enhance biocompatibility and minimize mechanical stress on spinal tissue. The electrode featured three circular gold contacts, each with a diameter of 1 mm, spaced 7 mm apart. Gold was selected for its excellent conductivity and stability under chronic implantation conditions. A Teflon-coated stainless-steel wire (A-M Systems, Cat. No. 793500) was used to connect the electrode to the implantable pulse generator (IPG). After soldering, the connections were cleansed with isopropyl alcohol and insulated using a medical-grade silicone elastomer (Permatex 65AR) to ensure long-term reliability and prevent fluid ingress.

**2.Verification of Electrode Positioning**

To ensure accurate placement, the position of the implanted electrodes was confirmed using post-operative imaging immediately following surgery to prevent potential displacement from animal activity. First, lateral X-ray images were acquired to verify that the electrode contacts were located within the epidural space at the vertebral levels from T12 to L2. Subsequently, high-resolution micro-computed tomography (CT) scans were performed. Three-dimensional reconstructions generated from the CT data allowed for precise visualization of the electrode array, confirming its coverage over the spinal segments associated with chronic pain.

**Supplementary Methods 3:Behavioral Tests**

**1. Mechanical Paw Withdrawal Threshold (PWT)**

Mechanical sensitivity was assessed using von Frey filaments. Rats were individually placed in transparent Plexiglas chambers on an elevated mesh floor and allowed to acclimate for approximately 20 minutes until exploration and grooming behaviors ceased. A series of calibrated von Frey filaments were applied perpendicularly to the plantar surface of the hind paw with sufficient force to cause bending for 2-3 seconds, with an interval of at least 5 seconds between stimuli to prevent desensitization. A positive response was defined as a rapid lifting, licking, or shaking of the paw. The testing procedure followed the up-down method, and the paw withdrawal threshold (PWT) was determined accordingly. The mean value from repeated tests was calculated for each animal.

**2. Thermal Paw Withdrawal Latency (PWL)**

Thermal nociception was evaluated using a radiant heat source. Rats were first acclimated to a transparent Plexiglas enclosure for 10 minutes. The radiant heat source was then focused on the plantar surface of the hind paw, and the time from heat onset to a clear paw withdrawal reflex was recorded as the PWL. The intensity of the heat source was adjusted to produce a baseline latency of approximately 10-15 seconds in naïve animals to prevent tissue damage. Each paw was tested three times with at least 5-minute intervals between trials, and the mean value was calculated as the final PWL.

**3. Open Field Test (OFT)**

General locomotor activity and anxiety-like behavior were assessed in an open field arena. The apparatus consisted of a large, square Plexiglas box. Rats were transported to the testing room at least 1 hour before the experiment to minimize stress. At the time of testing, each rat was gently placed in the center of the arena and allowed to explore freely for 5 minutes. The total distance traveled was automatically recorded and analyzed using a video-tracking system. The arena was thoroughly cleaned with 75% ethanol between trials to eliminate odor cues.

**4. Y-Maze Test**

Short-term spatial working memory was assessed using a Y-maze. The maze consists of three identical arms. Each rat was placed at the center of the maze and allowed to explore all three arms freely for 8 minutes. The sequence of arm entries was recorded manually or by a tracking system. An alternation was defined as entry into all three arms on consecutive choices (e.g., A-B-C, B-A-C, A-C-B). The percentage of spontaneous alternation was calculated using the following formula: % Spontaneous Alternation = [Number of Alternations / (Total Arm Entries - 2)] × 100. The maze was cleaned with ethanol after each test session.

**5. Novel Object Recognition (NOR) Test**

The NOR test was conducted to evaluate recognition memory. The NOR test arena was a square box (50×50×40 cm) made of opaque plastic.The test involves three phases over two days: habituation, training, and testing. On the first day, rats were allowed to habituate to the empty testing arena for 20 minutes. Four hours later, the training session was conducted by placing two identical objects into the arena; the rat was allowed to explore for 5 minutes. After a 24-hour retention interval, the testing session was performed, during which one familiar object was replaced by a novel object. The rat was again allowed to explore for 5 minutes. Exploration was defined as directing the nose toward the object at a distance of < 2 cm. A recognition index (RI) for the testing session was calculated as follows: RI = (Time spent exploring the novel object / Total exploration time for both objects) × 100%. All objects and the arena were cleaned thoroughly between trials.

**Supplementary Methods 4: AAV Vector Transfection and Stereotactic Injection**

**1.In Vitro Transfection of Primary Microglia**

Primary microglia were seeded in 24-well plates at a density of 3-5×10⁴ cells per well in 300 μL of culture medium and allowed to adhere until approximately 80% confluent. On the following day, the cells were transfected with adeno-associated virus (AAV) vectors at a multiplicity of infection (MOI) of 10. The required volume of viral stock (titer: 1×10¹⁰ pfu/mL) was calculated and diluted in fresh medium. The diluted virus solution was added gently to the cells, and the plates were incubated overnight at 37°C with 5% CO₂. After 12 hours, the medium was replaced with fresh culture medium. Transfection efficiency was assessed approximately 24 hours post-transfection by observing green fluorescent protein (GFP) expression using an inverted fluorescence microscope.

**2.Stereotactic Injection into the Rat Prefrontal Cortex (PFC)**

For in vivo delivery, AAV vectors were stereotactically injected into the rat PFC. Rats were deeply anesthetized with sodium pentobarbital and securely mounted on a stereotaxic apparatus. The skull was exposed, and the bregma point was identified and used as the reference for coordinate zeroing. The skull surface was adjusted to ensure horizontal alignment. Injection coordinates relative to bregma for the PFC were as follows: Anteroposterior (AP), +2.7 mm; Mediolateral (ML), ±0.5 mm; Dorsoventral (DV), -2.8 mm. A small craniotomy was performed at the target site using a dental drill. AAV vectors (AAV9-sh-lncRNA or AAV9-OE-PCM1) were loaded into a glass micropipette connected to a microinjection system. The pipette was slowly lowered to the target depth, and the virus was infused at a rate of 40-80 nl/min. Following the injection, the pipette was left in place for 10 minutes to allow for viral diffusion and then withdrawn slowly. The scalp was sutured, and animals were placed on a heating pad for postoperative recovery.
